# Supplementary material for: A non-metallic SERS-based immunoassay founded by light-harvesting effect and strengthened chemical enhancement
Source: Royal Society of Chemistry journal article supplement (doi:10.1039/d3an00171g), 2023-01-01
Supplement: d3an00171g1.pdf [file d3an00171g1.pdf]

## Supporting Information

### **Non-metallic SERS-based immunoassay founded by light harvesting effect and strengthened chemical enhancement**

Jiali Ma<sup>a</sup>, Wenxin Dong<sup>a</sup>, Tao Xu<sup>c</sup>, Guodong Wei<sup>b</sup>, Chenjie Gu<sup>a,\*</sup>, Tao Jiang<sup>a,\*</sup>

*<sup>a</sup>School of Physical Science and Technology, Ningbo University, Ningbo 315211, Zhejiang, P. R.*

*China*

*<sup>b</sup>Materials Institute of Atomic and Molecular Science, Shaanxi University of Science and Technology, Xian 710021, Shaanxi, P. R. China*

*<sup>c</sup>Department of Pharmacy, Ningbo City First Hospital, Ningbo, 315211, Zhejiang, P. R. China*

---

\*Corresponding author: Chenjie Gu, E-mail: guchenje@nbu.edu.cn, Tao Jiang, E-mail: jiangtao@nbu.edu.cn, 818 Fenghua Road, Ningbo 315211 China

### *2.1.1. Preparation of MoS<sub>2</sub> nanoflowers*

MoS<sub>2</sub> nanoflowers were prepared by a typical hydrothermal reaction. Briefly, 0.76 g of NaMoO<sub>4</sub>·2H<sub>2</sub>O and 0.6 g of CH<sub>4</sub>N<sub>2</sub>S were added to 80 mL of deionized water and agitated vigorously for 60 min. After sufficient dissolution, the precursor solution was decanted into a reaction vessel and kept at 200 °C for 15 h. Following, the solid product was chilled to room temperature and repeatedly washed with NaOH solution, ethanol, and deionized water, respectively. Finally, MoS<sub>2</sub> samples were obtained by desiccating at 80 °C for 12 h.

### *2.1.2. Fabrication of MoS<sub>2</sub> nanoflower-based immunoprobe*

The preparation process of R6G-labelled MoS<sub>2</sub> immunoprobe was described as follows. It should be noted that the R6G molecule was chosen as the Raman label here due to its discriminable fingerprint spectrum, which made the immunoassay result more exact and credible. Firstly, 100 μL of 10<sup>-2</sup> mol/L R6G was incubated with the as-prepared MoS<sub>2</sub> solution (1 mL, 10 mg/mL) for 12 h under room ambient temperature. The redundant R6G was then dislodged by washing several times with deionized water and the sediment was stored in 1 mL of PBS solution. Afterwards, 20 μL of anti-ferritin with a concentration of 0.2 mg/mL was incorporated into the above as-prepared R6G-modified MoS<sub>2</sub> solution by electrostatic and hydrophobic interactions, as well as remained at 4 °C for 12 h. After the blended solution was washed, 3 wt% BSA blocking agent

was applied to screen the exposed areas on the MoS<sub>2</sub> surfaces. Following an incubation period of 1 h at 37 °C, the BSA was removed by centrifugation and the complexes were distributed in 1 mL of PBS solution. The MoS<sub>2</sub> immunoprobe linked with anti-ferritin was ultimately obtained.

### *2.1.3. Fabrication of MoS<sub>2</sub>@RP immunosubstrate*

The MoS<sub>2</sub>@RP composite nanoplates were manufactured by a high temperature method under sealed condition.<sup>1,2</sup> To be specific, MoS<sub>2</sub> nanosheets were firstly synthesized using a simple hydrothermal strategy, and then red phosphorus (RP) was introduced into the MoS<sub>2</sub> sample in a ratio of 1 to 4 by the method mentioned above. With regard to the preparation of immunosubstrate, 20 μL of anti-ferritin (0.2 mg/mL) was immobilized on the surface of MoS<sub>2</sub>@RP (1 mL, 20 mg/mL) material and cultivated at 4 °C for 12 h. Upon washing several times with PBS solution, the non-specific binding sites on the substrate were subsequently shielded by 3 wt% BSA blocking agent. Afterwards, the surplus blocker was eliminated by centrifugal washing. Ultimately, the precipitate was dispersed in 1 mL of PBS solution to obtain ferritin-modified MoS<sub>2</sub>@RP immunosubstrate.

| <i>Element</i> | <i>Wt%</i>        | <i>At%</i>   |
|----------------|-------------------|--------------|
| <i>MoL</i>     | <i>57.99</i>      | <i>31.57</i> |
| <i>SK</i>      | <i>42.01</i>      | <i>68.43</i> |
| <i>Matrix</i>  | <i>Correction</i> | <i>ZAF</i>   |

| <i>Element</i> | <i>Wt%</i>        | <i>At%</i>   |
|----------------|-------------------|--------------|
| <i>MoL</i>     | <i>45.35</i>      | <i>21.44</i> |
| <i>SK</i>      | <i>29.93</i>      | <i>42.36</i> |
| <i>PK</i>      | <i>24.72</i>      | <i>36.20</i> |
| <i>Matrix</i>  | <i>Correction</i> | <i>ZAF</i>   |

**Fig. S1.** The element content of MoS<sub>2</sub> nanoflowers and MoS<sub>2</sub>@RP composite nanoplates from the corresponding EDS spectrum.

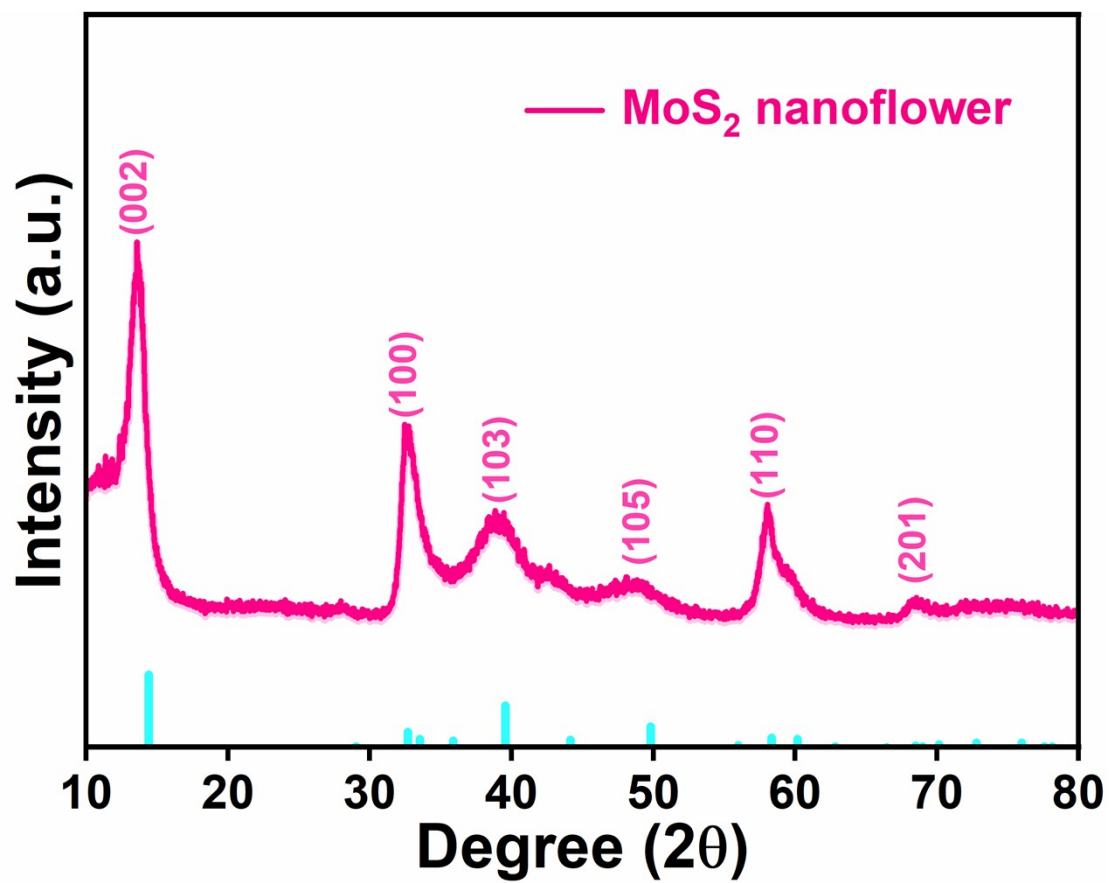

Fig. S2. Typical XRD pattern of MoS<sub>2</sub> nanoflowers.

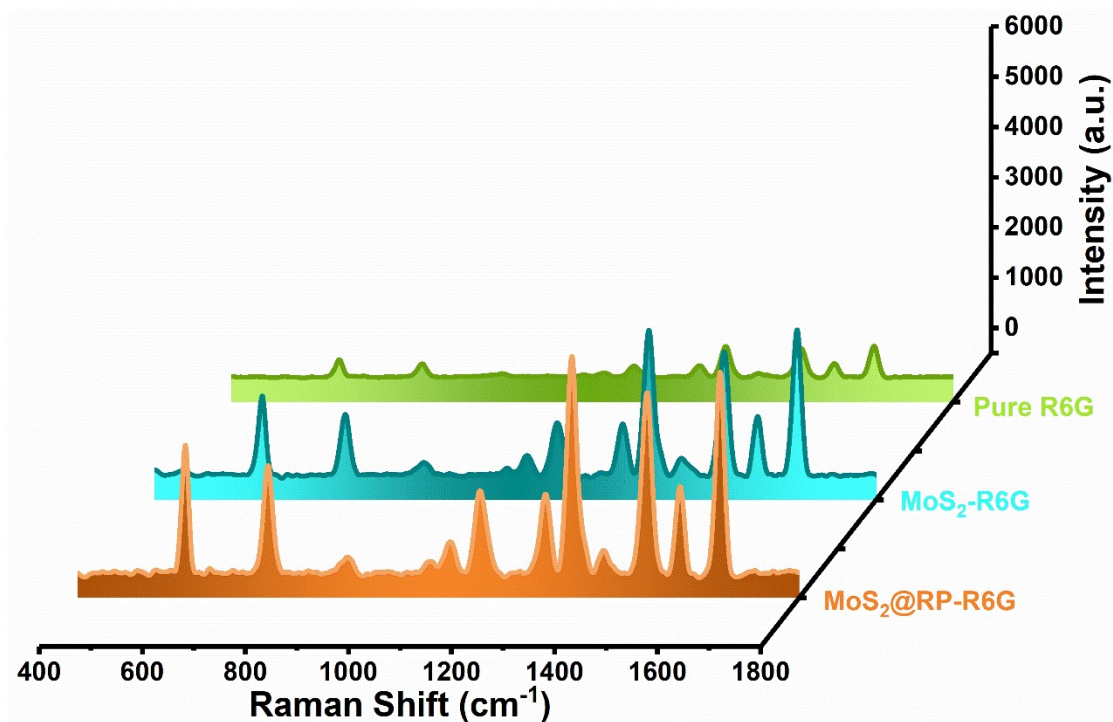

**Fig. S3.** SERS spectrum of R6G molecules ( $10^{-5}$  M) attached on MoS<sub>2</sub> nanoflowers and MoS<sub>2</sub>@RP composite nanoplates, together with the Raman spectra of pure R6G powder.

To quantify the SERS enhancement ability of MoS<sub>2</sub> nanoflowers and MoS<sub>2</sub>@RP composite nanoplates, the enhancement factor (EF) was subsequently calculated according to the typical equation  $EF = (I_{\text{SERS}}/I_{\text{bulk}}) \times (N_{\text{bulk}}/N_{\text{SERS}})$ .<sup>3</sup> Specifically,  $I_{\text{bulk}}$  and  $I_{\text{SERS}}$  refer to the integrated intensities of Raman peak at 1360 cm<sup>-1</sup> for pure R6G and the R6G that adsorbed on the SERS active materials, respectively. The  $N_{\text{bulk}}$  calculation procedure was performed as follows. First, 10.06 mg of R6G powder was sufficiently dissolved in 30  $\mu\text{L}$  of ethanol. Then, 10  $\mu\text{L}$  of R6G solution was uniformly dispersed on the surface of the silicon wafer ( $0.5 \times 0.5$  cm<sup>2</sup>) and dried naturally in air. It should be pointed out that the area covered by

R6G represents the area of the silicon wafer substrate. The corresponding values were obtained according to the formula  $N_{\text{bulk}} = N_A \times C \times V \times (S_{\text{SERS}}/S_{\text{bulk}})$ , where  $N_A$  is Avogadro constant,  $C$  is the concentration of R6G, and  $V$  is the volume of R6G solution dropped onto the silicon wafer. Based on the parameter settings of the Raman spectrometer used (laser wavelength: 532 nm, laser power: 1 mW, laser spot area: 20  $\mu\text{m}$ , integration time: 10 s), the area of the substrate could be derived as  $S_{\text{bulk}} = 0.50 \text{ cm} \times 0.50 \text{ cm} = 2.50 \times 10^{-5} \text{ m}^2$ . The effective area of the R6G molecule that can be excited by the laser is  $S_{\text{SERS}} = \pi \times R^2 = 1.26 \times 10^{-9} \text{ m}^2$ . Therefore, the  $N_{\text{bulk}}$  was derived from the above parameters as  $2.37 \times 10^{14}$ . For the calculation of  $N_{\text{SERS}}$ , the similar calculation method as mentioned above was employed. Distinctively, 10  $\mu\text{L}$  of  $10^{-5} \text{ M}$  R6G solution was dropped onto the surface of the SERS-active composites that were uniformly dispersed on the silicon wafer with an area of  $0.5 \times 0.5 \text{ cm}^2$ . It could be deduced that the value of  $N_{\text{SERS}}$  was  $3.0 \times 10^8$ .

The integrated area of the corresponding Raman peaks indicated that the  $I_{\text{SERS}}$  of the  $\text{MoS}_2@\text{RP}$  composite nanoplates was  $1.1 \times 10^5$ ,  $I_{\text{SERS}}$  of  $\text{MoS}_2$  nanoflower was  $2.6 \times 10^4$ , and  $I_{\text{bulk}}$  of the pure R6G was  $1.1 \times 10^4$ . Eventually, the corresponding EF values of  $\text{MoS}_2@\text{RP}$  composite nanoplates and  $\text{MoS}_2$  nanoflowers were calculated to be  $8.0 \times 10^6$  and  $1.9 \times 10^6$ , respectively. Briefly, the  $\text{MoS}_2$  and  $\text{MoS}_2@\text{RP}$  composite nanoplates with the outstanding EF values that were comparable to noble

metals, which compensated the disadvantage for the inferior SERS enhancement ability of ordinary semiconductors. Furthermore, the semiconductors prepared here also feature excellent biocompatibility, exhibiting extraordinary potential for ultra-sensitive detection of clinical biomarkers.



## Reference

1. J. Jiang, H. Liu, X. Li, Y. Chen, C. Gu, G. Wei, J. Zhou and T. Jiang, *Biosens. Bioelectron.*, 2021, 193, 113481.
2. T. Zhang, Y. Wan, H. Xie, Y. Mu, P. Du, D. Wang, X. Wu, H. Ji and L. Wan, *J. Am. Chem. Soc.*, 2018, 140, 7561-7567.
3. X. Wang, W. Shi, Z. Jin, W. Huang, J. Lin, G. Ma, S. Li and L. Guo, *Angew. Chem. Int. Edit.*, 2017, 56, 9851-9855.
